# Supplementary material
Source: PubMed Central journal article supplement (PMC2940621)
Supplement: supp_nop061_nop061supp.pdf [file supp_nop061_nop061supp.pdf]

Supp Table 2: Summary of the genetic aberrations on chromosome 14q commonly found in different types of cancers.

| References                                                                                                                                                                                                                                                                                                                                                                                                                                                                                              | Chromosome aberrations                                                                                                               | Human cancer                                  |
|---------------------------------------------------------------------------------------------------------------------------------------------------------------------------------------------------------------------------------------------------------------------------------------------------------------------------------------------------------------------------------------------------------------------------------------------------------------------------------------------------------|--------------------------------------------------------------------------------------------------------------------------------------|-----------------------------------------------|
| Brownlee NA <sup>1</sup>                                                                                                                                                                                                                                                                                                                                                                                                                                                                                | del(14)(q24.1q31.1)                                                                                                                  | Clear cell sarcoma of the kidney              |
| Simon M <sup>2</sup> , Lusic EA <sup>3</sup> , Perry A <sup>4</sup> , Al-Mefty O <sup>5</sup> , Perry A <sup>6</sup> , Leone PE <sup>7</sup> , Tse JY <sup>8</sup> , Simon M <sup>9</sup> .                                                                                                                                                                                                                                                                                                             | losses on chromosome 14q                                                                                                             | Meningiomas                                   |
| Dinjens WN <sup>10</sup> , Yanagi M <sup>11</sup> , Orita H <sup>12</sup> , Dai YC <sup>13</sup> , Cazals-Hatem D <sup>14</sup> , Chen Y <sup>15</sup> , Fukasawa T <sup>16</sup> , Breiner JA <sup>17</sup> , El-Rifai W <sup>18</sup> , El-Rifai W <sup>19</sup> , el-Rifai W <sup>20</sup> , Diep CB <sup>21</sup> , Thorstensen L <sup>22</sup> , Shao L <sup>23</sup> , Ookawa K <sup>24</sup> , Ookawa K <sup>24</sup> , Kang YK <sup>25</sup> , Bando T <sup>26</sup> , Yokota J <sup>27</sup> . | 7.1-mega base pairs minimal deletion at 14q31.1-32.11, LOH 14q, deletion 14q32, losses on chromosome 14q, allelic imbalance (AI) 14q | Colon and lower gastrointestinal tract cancer |
| Strefford JC <sup>28</sup> , Gallou C <sup>29</sup> , Bérout C <sup>30</sup> , Thrash-Bingham CA(I) <sup>31</sup> , Thrash-Bingham CA(II) <sup>32</sup> , Bulashevskaya S <sup>33</sup> , Peres EM <sup>34</sup> , Tzai TS <sup>35</sup> , Nakayama K <sup>36</sup> , Phillips JL <sup>37</sup> , Schwerdtle RF <sup>38</sup> ,                                                                                                                                                                         | LOH 14q, losses on chromosome 14q                                                                                                    | Kidney and bladder cancer                     |

|                                                                                                                                                                                                                                                                                         |                                                                                           |                                                 |
|-----------------------------------------------------------------------------------------------------------------------------------------------------------------------------------------------------------------------------------------------------------------------------------------|-------------------------------------------------------------------------------------------|-------------------------------------------------|
| Herbers J <sup>39</sup> , Tsai YC <sup>40</sup> .                                                                                                                                                                                                                                       |                                                                                           |                                                 |
| Dichamp C <sup>41</sup> , Ransom DT <sup>42</sup> .<br><br>Hu J <sup>43</sup> .                                                                                                                                                                                                         | Loss of 14q chromosome<br>and methylation<br><br>deletion 14q13-31,<br><br>14q32.1, 14q11 | Oligodendroglial<br>and astrocytic<br>tumours   |
| Pang A <sup>44</sup> , Piao Z <sup>45</sup> , Nagai H <sup>46</sup> .                                                                                                                                                                                                                   | losses on chromosome<br><br>14q                                                           | Liver cancer                                    |
| Cheng Y <sup>47</sup> , Fang Y <sup>48</sup> , Lo KW <sup>49</sup><br><br>Shao J <sup>50</sup> , Yan J <sup>51</sup> , Chen YJ <sup>52</sup> ,<br><br>Mutirangura A <sup>53</sup> , Mutirangura<br>A <sup>54</sup> , Wei F <sup>55</sup> , Ihara Y <sup>56</sup> , Hu N <sup>57</sup> . | extensive and multiple<br>regions of allelic loss<br><br>occur on chromosome 14           | Upper<br>gastrointestinal tract<br>cancer       |
| Kwong FM <sup>58</sup> .                                                                                                                                                                                                                                                                | LOH 14q                                                                                   | Non-small cell lung<br>carcinoma                |
| Pylkkänen L <sup>59</sup> , De Rienzo A <sup>60</sup> .                                                                                                                                                                                                                                 | LOH 14q                                                                                   | Human malignant<br>mesothelioma<br>(MM)-(asbes) |
| Thompson PM <sup>61</sup> , Hoshi M <sup>62</sup> ,<br><br>,Grosfeld JL <sup>63</sup> , Theobald M <sup>64</sup> ,<br><br>Takita J <sup>65</sup> , Takayama H <sup>66</sup> , Fong<br>CT <sup>67</sup> , Brodeur GM <sup>68</sup> .                                                     | LOH 14q                                                                                   | Neuroblastoma                                   |
| Mori N <sup>69</sup>                                                                                                                                                                                                                                                                    | LOH 14q                                                                                   | Myelodysplastic                                 |

|                                                     |                                     |                                                                 |
|-----------------------------------------------------|-------------------------------------|-----------------------------------------------------------------|
|                                                     |                                     | syndrome<br>(MDS)(blood stem cells)                             |
| Wong KF <sup>70</sup> .                             | Inv(14q)                            | T-cell<br>prolymphocytic<br>leukaemia (T-PLL)                   |
| Döhner H <sup>71</sup> , Dierlamm J <sup>72</sup> . | Trisomy 12 and the<br>"14q+" marker | B-cell chronic<br>lymphocytic<br>leukaemia (B-CLL)              |
| Bandera CA <sup>73</sup> , Cliby W <sup>74</sup> .  | LOH 14q                             | Ovarian carcinomas<br><br>Primary epithelial<br>ovarian tumours |
| Nawroz H <sup>75</sup>                              | LOH 14q                             | Head and neck<br>squamous cell<br>carcinoma                     |

**References:**

- .1 Brownlee NA, Perkins LA, Stewart W, et al. Recurring translocation (10;17) and deletion (14q) in clear cell sarcoma of the kidney. *Arch Pathol Lab Med.* Mar 2007;131(3):446-451.
- .2 Simon M, Bostrom JP, Hartmann C. Molecular genetics of meningiomas: from basic research to potential clinical applications. *Neurosurgery.* May 2007;60(5):787-798; discussion 787-798.
- .3 Lusk EA, Watson MA, Chicoine MR, et al. Integrative genomic analysis identifies NDRG2 as a candidate tumor suppressor gene frequently inactivated in clinically aggressive meningioma. *Cancer Res.* Aug 15 2005;65(16):7121-7126.
- .4 Perry A, Gutmann DH, Reifenberger G. Molecular pathogenesis of meningiomas. *J Neurooncol.* Nov 2004;70(2):183-202.
- .5 Al-Mefty O, Kadri PA, Pravdenkova S, Sawyer JR, Stangeby C, Husain M. Malignant progression in meningioma: documentation of a series and analysis of cytogenetic findings. *J Neurosurg.* Aug 2004;101(2):210-218.
- .6 Perry A, Giannini C, Raghavan R, et al. Aggressive phenotypic and genotypic features in pediatric and NF2-associated meningiomas: a clinicopathologic study of 53 cases. *J Neuropathol Exp Neurol.* Oct 2001;60(10):994-1003.
- .7 Leone PE, Bello MJ, de Campos JM, et al. NF2 gene mutations and allelic status of 1p, 14q and 22q in sporadic meningiomas. *Oncogene.* Apr 1 1999;18(13):2231-2239.
- .8 Tse JY, Ng HK, Lau KM, Lo KW, Poon WS, Huang DP. Loss of heterozygosity of chromosome 14q in low- and high-grade meningiomas. *Hum Pathol.* Jul 1997;28(7):779-785.

- .9 Simon M, von Deimling A, Larson JJ, et al. Allelic losses on chromosomes 14, 10, and 1 in atypical and malignant meningiomas: a genetic model of meningioma progression. *Cancer Res.* Oct 15 1995;55(20):4696-4701.
- .10 Korpershoek E, Petri BJ, van Nederveen FH, et al. Candidate gene mutation analysis in bilateral adrenal pheochromocytoma and sympathetic paraganglioma. *Endocr Relat Cancer.* Jun 2007;14(2):453-462.
- .11 Yanagi M, Keller G, Mueller J, et al. Comparison of loss of heterozygosity and microsatellite instability in adenocarcinomas of the distal esophagus and proximal stomach. *Virchows Arch.* Dec 2000;437(6):605-610.
- .12 Orita H, Sakamoto N, Ajioka Y, et al. Allelic loss analysis of early-stage flat-type colorectal tumors. *Ann Oncol.* Jan 2006;17(1):43-49.
- .13 Dai YC, Ho CL, Tsai YC, et al. Allelic loss of 14q32 in the pathogenesis of gastrointestinal and ampullary malignancies: mapping of the target region to a 17 cM interval. *J Cancer Res Clin Oncol.* Feb 2005;131(2):94-100.
- .14 Cazals-Hatem D, Rebouissou S, Bioulac-Sage P, et al. Clinical and molecular analysis of combined hepatocellular-cholangiocarcinomas. *J Hepatol.* Aug 2004;41(2):292-298.
- .15 Chen Y, Tzeng CC, Liou CP, Chang MY, Li CF, Lin CN. Biological significance of chromosomal imbalance aberrations in gastrointestinal stromal tumors. *J Biomed Sci.* Jan-Feb 2004;11(1):65-71.
- .16 Fukasawa T, Chong JM, Sakurai S, et al. Allelic loss of 14q and 22q, NF2 mutation, and genetic instability occur independently of c-kit mutation in gastrointestinal stromal tumor. *Jpn J Cancer Res.* Dec 2000;91(12):1241-1249

- .17 Breiner JA, Meis-Kindblom J, Kindblom LG, et al. Loss of 14q and 22q in gastrointestinal stromal tumors (pacemaker cell tumors). *Cancer Genet Cytogenet.* Jul 15 2000;120(2):111-116.
- .18 El-Rifai W, Sarlomo-Rikala M, Andersson LC, Miettinen M, Knuutila S. High-resolution deletion mapping of chromosome 14 in stromal tumors of the gastrointestinal tract suggests two distinct tumor suppressor loci. *Genes Chromosomes Cancer.* Apr 2000;27(4):387-391.
- .19 El-Rifai W, Sarlomo-Rikala M, Andersson LC, Knuutila S, Miettinen M. DNA sequence copy number changes in gastrointestinal stromal tumors: tumor progression and prognostic significance. *Cancer Res.* Jul 15 2000;60(14):3899-3903.
- .20 el-Rifai W, Sarlomo-Rikala M, Miettinen M, Knuutila S, Andersson LC. DNA copy number losses in chromosome 14: an early change in gastrointestinal stromal tumors. *Cancer Res.* Jul 15 1996;56(14):3230-3233.
- .21 Diep CB, Thorstensen L, Meling GI, Skovlund E, Rognum TO, Lothe RA. Genetic tumor markers with prognostic impact in Dukes' stages B and C colorectal cancer patients. *J Clin Oncol.* Mar 1 2003;21(5):820-829.
- .22 Thorstensen L, Qvist H, Nesland JM, Giercksky KE, Lothe RA. Identification of two potential suppressor gene regions on chromosome arm 14q that are commonly lost in advanced colorectal carcinomas. *Scand J Gastroenterol.* Dec 2001;36(12):1327-1331.
- .23 Shao L, Lai M, Huang Q. Mutagen sensitivity and p53 expression in colorectal cancer in China. *Postgrad Med J.* Nov 2001;77(913):713-716.
- .24 Ookawa K, Sakamoto M, Hirohashi S, et al. Concordant p53 and DCC alterations and allelic losses on chromosomes 13q and 14q associated with

- liver metastases of colorectal carcinoma. *Int J Cancer*. Feb 1 1993;53(3):382-387.
- .25 Kang YK, Kim YI, Kim WH. Allelotype analysis of intrahepatic cholangiocarcinoma. *Mod Pathol*. Jun 2000;13(6):627-631.
- .26 Bando T, Kato Y, Ihara Y, Yamagishi F, Tsukada K, Isobe M. Loss of heterozygosity of 14q32 in colorectal carcinoma. *Cancer Genet Cytogenet*. Jun 1999;111(2):161-165.
- .27 Yokota J, Ookawa K, Nishikawa R, Sameshima Y. Tumor suppressor genes involved in metastasis of lung and colorectal carcinomas. *Princess Takamatsu Symp*. 1991;22:71-76.
- .28 Strefford JC, Stasevich I, Lane TM, Lu YJ, Oliver T, Young BD. A combination of molecular cytogenetic analyses reveals complex genetic alterations in conventional renal cell carcinoma. *Cancer Genet Cytogenet*. May 2005;159(1):1-9.
- .29 Gallou C, Mejean A, Bouvier R, et al. Delineation of a 2.8 megabases region harboring a potential tumor suppressor gene involved in renal cell carcinoma, that is commonly deleted from chromosome 14. *Anticancer Res*. Nov-Dec 2003;23(6C):4865-4870.
- .30 Beroud C, Fournet JC, Jeanpierre C, et al. Correlations of allelic imbalance of chromosome 14 with adverse prognostic parameters in 148 renal cell carcinomas. *Genes Chromosomes Cancer*. Dec 1996;17(4):215-224.
- .31 Thrash-Bingham CA, Salazar H, Freed JJ, Greenberg RE, Tartof KD. Genomic alterations and instabilities in renal cell carcinomas and their relationship to tumor pathology. *Cancer Res*. Dec 15 1995;55(24):6189-6195.



- .32 Thrash-Bingham CA, Greenberg RE, Howard S, et al. Comprehensive allelotyping of human renal cell carcinomas using microsatellite DNA probes. *Proc Natl Acad Sci U S A*. Mar 28 1995;92(7):2854-2858.
- .33 Bulashevska S, Szakacs O, Brors B, Eils R, Kovacs G. Pathways of urothelial cancer progression suggested by Bayesian network analysis of allelotyping data. *Int J Cancer*. Jul 20 2004;110(6):850-856.
- .34 Peres EM, Savasan S, Cushing B, Abella S, Mohamed AN. Chromosome analyses of 16 cases of Wilms tumor: different pattern in unfavorable histology. *Cancer Genet Cytogenet*. Jan 1 2004;148(1):66-70.
- .35 Tzai TS, Chen HH, Chan SH, et al. Clinical significance of allelotype profiling for urothelial carcinoma. *Urology*. Aug 2003.378-384:(2)62;
- .36 Nakayama K, Konno M, Kanzaki A, et al. Allelotype analysis of gallbladder carcinoma associated with anomalous junction of pancreaticobiliary duct. *Cancer Lett*. May 26 2001;166(2):135-141.
- .37 Phillips JL, Ghadimi BM, Wangsa D, et al. Molecular cytogenetic characterization of early and late renal cell carcinomas in von Hippel-Lindau disease. *Genes Chromosomes Cancer*. May 2001;31(1):1-9.
- .38 Schwerdtle RF, Winterpacht A, Storkel S, et al. Loss of heterozygosity studies and deletion mapping identify two putative chromosome 14q tumor suppressor loci in renal oncocytomas. *Cancer Res*. Nov 15 1997;57(22):5009-5012.
- .39 Herbers J, Schullerus D, Muller H, et al. Significance of chromosome arm 14q loss in nonpapillary renal cell carcinomas. *Genes Chromosomes Cancer*. May 1997;19(1):29-35.

- .40 Tsai YC, Nichols PW, Hiti AL, Williams Z, Skinner DG, Jones PA. Allelic losses of chromosomes 9, 11, and 17 in human bladder cancer. *Cancer Res.* Jan 1 1990;50(1):44-47.
- .41 Dichamp C, Taillibert S, Aguirre-Cruz L, et al. Loss of 14q chromosome in oligodendroglial and astrocytic tumors. *J Neurooncol.* May 2004;67(3):281-285.
- .42 Ransom DT, Ritland SR, Moertel CA, et al. Correlation of cytogenetic analysis and loss of heterozygosity studies in human diffuse astrocytomas and mixed oligo-astrocytomas. *Genes Chromosomes Cancer.* Nov 1992;5(4):357-374.
- .43 Hu J, Jiang C, Ng HK, Pang JC, Tong CY, Chen S. Genome-wide allelotype study of primary glioblastoma multiforme. *Chin Med J (Engl).* Apr 2003;116(4):577-583.
- .44 Pang A, Ng IO, Fan ST, Kwong YL. Clinicopathologic significance of genetic alterations in hepatocellular carcinoma. *Cancer Genet Cytogenet.* Oct 1 2003;146(1):8-15.
- .45 Piao Z, Park C, Park JH, Kim H. Allelotype analysis of hepatocellular carcinoma. *Int J Cancer.* Jan 5 1998;75(1):29-33.
- .46 Nagai H, Emi M, Terada Y, et al. DNA alterations during multi-step development of human hepatocellular carcinomas revealed by laser capture microdissection. *Hepatol Res.* Jul 2003;26(3):199-208.
- .47 Cheng Y, Ko JM, Lung HL, Lo PH, Stanbridge EJ, Lung ML. Monochromosome transfer provides functional evidence for growth-suppressive genes on chromosome 14 in nasopharyngeal carcinoma. *Genes Chromosomes Cancer.* Aug 2003;37(4):359-368.

- .48 Fang Y, Guan X, Guo Y, et al. Analysis of genetic alterations in primary nasopharyngeal carcinoma by comparative genomic hybridization. *Genes Chromosomes Cancer*. Mar 2001;30(3):254-260.
- .49 Lo KW, Teo PM, Hui AB, et al. High resolution allelotype of microdissected primary nasopharyngeal carcinoma. *Cancer Res*. Jul 1 2000;60(13):3348-3353.
- .50 Shao J, Li Y, Wu Q, et al. High frequency loss of heterozygosity on the long arms of chromosomes 13 and 14 in nasopharyngeal carcinoma in Southern China. *Chin Med J (Engl)*. Apr 2002;115(4):571-575.
- .51 Yan J, Fang Y, Liang Q, Huang Y, Zeng Y. Novel chromosomal alterations detected in primary nasopharyngeal carcinoma by comparative genomic hybridization. *Chin Med J (Engl)*. Apr 2001;114(4):418-421.
- .52 Chen YJ, Ko JY, Chen PJ, et al. Chromosomal aberrations in nasopharyngeal carcinoma analyzed by comparative genomic hybridization. *Genes Chromosomes Cancer*. Jun 1999;25(2):169-175.
- .53 Mutirangura A, Charuruks N, Shuangshoti S, et al. Identification of distinct regions of allelic loss on chromosome 13q in nasopharyngeal cancer from paraffin embedded tissues. *Int J Cancer*. Oct 8 1999;83(2):210-214.
- .54 Mutirangura A, Tanunyutthawongese C, Pornthanakasem W, et al. Genomic alterations in nasopharyngeal carcinoma: loss of heterozygosity and Epstein-Barr virus infection. *Br J Cancer*. 1997;76(6):770-776.
- .55 Wei F, Ni J, Wu SS, et al. Cytogenetic studies of esophageal squamous cell carcinomas in the northern Chinese population by comparative genomic hybridization. *Cancer Genet Cytogenet*. Oct 1 2002;138(1):38-43.

- .56 Ihara Y, Kato Y, Bando T, et al. Allelic imbalance of 14q32 in esophageal carcinoma. *Cancer Genet Cytogenet.* Jun 2002;135(2):177-181.
- .57 Hu N, Roth MJ, Polymeropoulos M, et al. Identification of novel regions of allelic loss from a genomewide scan of esophageal squamous-cell carcinoma in a high-risk Chinese population. *Genes Chromosomes Cancer.* Mar 2000;27(3):217-228.
- .58 Kwong FM, Wong PS, Lung ML. Genetic alterations detected on chromosomes 13 and 14 in Chinese non-small cell lung carcinomas. *Cancer Lett.* Mar 31 2003;192(2):189-198.
- .59 Pylkkanen L, Sainio M, Ollikainen T, et al. Concurrent LOH at multiple loci in human malignant mesothelioma with preferential loss of NF2 gene region. *Oncol Rep.* Sep-Oct 2002;9(5):955-959.
- .60 De Rienzo A, Jhanwar SC, Testa JR. Loss of heterozygosity analysis of 13q and 14q in human malignant mesothelioma. *Genes Chromosomes Cancer.* Jul 2000;28(3):337-341.
- .61 Thompson PM, Seifried BA, Kyemba SK, et al. Loss of heterozygosity for chromosome 14q in neuroblastoma. *Med Pediatr Oncol.* Jan 2001;36(1):28-31.
- .62 Hoshi M, Otagiri N, Shiwaku HO, et al. Detailed deletion mapping of chromosome band 14q32 in human neuroblastoma defines a 1.1-Mb region of common allelic loss. *Br J Cancer.* Jun 2000;82(11):1801-1807.
- .63 Grosfeld JL .Risk-based management: current concepts of treating malignant solid tumors of childhood. *J Am Coll Surg.* Oct 1999;189(4):407-425.

- .64 Theobald M, Christiansen H, Schmidt A, et al. Sublocalization of putative tumor suppressor gene loci on chromosome arm 14q in neuroblastoma. *Genes Chromosomes Cancer*. Sep 1999;26(1):40-46.
- .65 Takita J, Hayashi Y, Kohno T, et al. Allelotype of neuroblastoma. *Oncogene*. Nov 2 1995;11(9):1829-1834.
- .66 Takayama H, Suzuki T, Mugishima H, et al. Deletion mapping of chromosomes 14q and 1p in human neuroblastoma. *Oncogene*. Jun 1992;7(6):1185-1189.
- .67 Fong CT, White PS, Peterson K, et al. Loss of heterozygosity for chromosomes 1 or 14 defines subsets of advanced neuroblastomas. *Cancer Res*. Apr 1 1992;52(7):1780-1785.
- .68 Brodeur GM. Neuroblastoma--clinical applications of molecular parameters. *Brain Pathol*. Sep 1990;1(1):47-54.
- .69 Mori N, Morosetti R, Hoflehner E, Lubbert M, Mizoguchi H, Koeffler HP. Allelic loss in the progression of myelodysplastic syndrome. *Cancer Res*. Jun 1 2.3039-3042:(11)60:000
- .70 Wong KF, Chan JK, Sin VC. T-cell prolymphocytic leukemia with a novel translocation (6;11)(q21;q23). *Cancer Genet Cytogenet*. Jun 1999;111(2):149-151.
- .71 Dohner H, Stilgenbauer S, Dohner K, Bentz M, Lichter P. Chromosome aberrations in B-cell chronic lymphocytic leukemia: reassessment based on molecular cytogenetic analysis. *J Mol Med*. Feb 1999;77(2):266-281.
- .72 Dierlamm J, Michaux L, Criel A, Wlodarska I, Van den Berghe H, Hossfeld DK. Genetic abnormalities in chronic lymphocytic leukemia and their clinical and prognostic implications. *Cancer Genet Cytogenet*. Mar 1997;94(1):27-35.

- .73 Bandera CA, Takahashi H, Behbakht K, et al. Deletion mapping of two potential chromosome 14 tumor suppressor gene loci in ovarian carcinoma. *Cancer Res.* Feb 1 1997;57(3):513-515.
- .74 Cliby W, Ritland S, Hartmann L, et al. Human epithelial ovarian cancer allelotype. *Cancer Res.* May 15 1993;53(10 Suppl):2393-2398.
- .75 Nawroz H, van der Riet P, Hruban RH, Koch W, Ruppert JM, Sidransky D. Allelotype of head and neck squamous cell carcinoma. *Cancer Res.* Mar 1 1994;54(5):1152-1155.
